# 1 Alteration of coastal productivity and artisanal fisheries interact 2 to affect a marine food-web

3 M. Isidora Ávila-Thieme<sup>1,2,3</sup>, Derek Corcoran<sup>1,2</sup>, Alejandro Pérez-Matus<sup>1,4</sup>, Evie A. Wieters<sup>1,5</sup>,  
4 Sergio A. Navarrete<sup>1,5,6</sup>, Pablo A. Marquet<sup>1,2,7,8,9</sup> & Fernanda S. Valdovinos<sup>10\*</sup>

- 5 1. Departamento de Ecología, Facultad de Ciencias Biológicas, Pontificia Universidad Católica de  
6 Chile, Alameda 340, CP 8331150, Santiago, Chile.
- 7 2. Instituto de Ecología y Biodiversidad (IEB), Las Palmera 345, Santiago, Chile
- 8 3. Universidad Católica de la Santísima Concepción, Concepción, Chile
- 9 4. Subtidal Ecology Laboratory, Estación Costera de Investigaciones Marinas, Departamento de  
10 Ecología, Facultad de Ciencias Biológicas Pontificia Universidad Católica de Chile, Santiago,  
11 Casilla 114-D, Santiago, Chile
- 12 5. Estación Costera de Investigaciones Marinas - Las Cruces, Facultad de Ciencias Biológicas,  
13 Pontificia Universidad Católica de Chile, El Tabo 2690931, Chile
- 14 6. Centro de Ecología Aplicada y Sustentabilidad (CAPES), Facultad de Ciencias Biológicas,  
15 Pontificia Universidad Católica de Chile, Alameda 340, CP 8331150, Santiago, Chile.
- 16 7. Centro de Cambio Global UC (PUCGlobal), Alameda 340, CP 8331150, Santiago, Chile
- 17 8. The Santa Fe Institute, 1399 Hyde Park Road, Santa Fe NM 87501, USA
- 18 9. Instituto de Sistemas Complejos de Valparaíso (ISCV), Artillería 470, Cerro Artillería,  
19 Valparaíso, Chile
- 20 10. Department of Environmental Science and Policy, University of California, Davis

21 \* Corresponding author: [fvaldovinos@ucdavis.edu](mailto:fvaldovinos@ucdavis.edu)

22 Keywords: Network ecology, Allometric Trophic Network model, Global change, Benthic food-web,  
23 Intertidal rocky-shore, Biodiversity loss.

## 24 **ABSTRACT**

25           Top-down and bottom-up forces determine ecosystem function and dynamics. Fisheries  
26 as a top-down force can shorten and destabilize food-webs, while climate-change driven effects  
27 can alter the bottom-up forces of primary productivity. We assessed the response of a highly-  
28 resolved intertidal food-web to these two global-change drivers, using network analysis and  
29 bioenergetic modelling. We quantified the relative importance of artisanal fisheries as another  
30 predator species, and evaluated the independent and combined effects of fisheries and plankton-  
31 productivity changes on food-web dynamics. The food-web was robust to the loss of all  
32 harvested species but sensible to plankton-productivity decline. Interestingly, fisheries dampened  
33 the negative impacts of decreasing plankton productivity on non-harvested species, while  
34 plankton-productivity decline increased the sensitivity of harvested species to fishing. Our results  
35 show that strategies for new scenarios caused by climate change are needed to protect marine  
36 ecosystems and the wellbeing of local communities dependent on their resources.

## 37 **INTRODUCTION**

38           Direct human impacts and the full suite of drivers of global change are the main cause of  
39 species extinctions in Anthropocene ecosystems<sup>1,2</sup>, with detrimental consequences on ecosystem  
40 functioning and their services to human societies<sup>3,4</sup>. The world fisheries crisis is among those  
41 consequences, which cuts across fishing strategies, oceanic regions, species, and includes  
42 countries that have little regulation and those that have implemented rights-based co-  
43 management strategies to reduce overharvesting<sup>5-8</sup>. Chile has been one of the countries  
44 implementing Territorial Use Rights (TURFs<sup>9</sup>) over an unprecedented geographic scale to  
45 manage the diverse coastal benthic resources using a co-management strategy<sup>10,11</sup>. Over 60  
46 coastal benthic species form part of these artisanal fisheries<sup>10</sup>, with species that are extracted

47 from intertidal and shallow subtidal habitats<sup>12,13</sup>. The Chilean TURFs system brought significant  
48 improvements in sustainability of this complex socio-ecological system, helping to rebuild  
49 benthic fish stocks<sup>10,11</sup>, improving fishers' perception towards sustainability and increasing  
50 compliance<sup>9</sup>, as well as showing positive ancillary effects on conservation of biodiversity<sup>14,15</sup>.  
51 However, the situation of most artisanal fisheries is still far from sustainable, and many fish  
52 stocks and coastal ecosystems show signs of over exploitation and ecosystem degradation, a  
53 consequence of the low levels of cooperation and low enforcement of TURF regulations, which  
54 leads to high levels of free-riding and illegal fishing<sup>16-18</sup>. Thus, it is imperative to improve our  
55 understanding of the effects of these multi-species fisheries which simultaneously harvest  
56 species at all trophic levels, from kelp primary producers to top carnivores<sup>13,19</sup>.

57         To compound things, removal of biomass from the ocean occurs simultaneously with  
58 multiple other stressors associated to climate change that compromise the individuals' capacity  
59 to respond to perturbations<sup>20-22</sup>. Besides sea surface temperature (SST), climate change also  
60 affects many other physical-chemical characteristics of marine coastal waters (stratification,  
61 acidification, ventilation)<sup>23,24</sup>, as well as the wind regimes that control surface water productivity  
62 along the productive coastal upwelling ecosystems<sup>25-29</sup>. Changes in the productivity of the  
63 oceans are reflected in changes of plankton biomass, which contributes approximately half of the  
64 global primary production, supports the productivity of marine food-webs, and influences the  
65 biogeochemical process in the ocean and strongly affects commercial fisheries<sup>30-32</sup>. Indeed, an  
66 overall decrease in marine plankton productivity is expected over global scales<sup>24,30,33</sup>. Along  
67 extensive regions of the Humboldt upwelling ecosystem off Chile, long-term increases and  
68 decreases in plankton productivity have already occurred over the past two decades<sup>34,35</sup> and are  
69 expected to propagate up the pelagic and benthic food webs. We therefore analyzed the bottom-

70 up impact of fluctuations in plankton productivity in combination with fisheries exploitation of  
71 these food-webs using the concepts and methods of network ecology.

72 Network ecology has advanced our understanding of ecosystems by providing a powerful  
73 framework to analyze biological communities<sup>36,37</sup>. Previous studies used this framework to  
74 assess food-web robustness against species extinctions (i.e., the fraction of initial species that  
75 remain present in the ecosystem after a primary extinction)<sup>38-43</sup>, showing the importance for  
76 food-web persistence of highly connected species<sup>38,40,44,45</sup>, basal species<sup>39</sup> and highly connected  
77 species that trophically support other highly connected species<sup>42</sup>. Most of these studies used a  
78 static approach, which stems from network theory and analyzes the impacts of structural changes  
79 on food-webs represented by nodes (species) and links (interactions) that connect nodes, but  
80 ignores interaction strengths and population dynamics of interacting species<sup>38</sup>. Other studies used  
81 a dynamic approach, which considers not only the structure and intensity of interactions in a  
82 food-web, but also the changes in species biomasses through time and the indirect effects that  
83 these changes have on other species<sup>39-41,46,47</sup>. Here we use both approaches to understand the  
84 relative importance of harvested species in our food-web.

85 In this contribution, we analyze (1) the importance of harvested species for the structure  
86 and persistence of the intertidal food-web by simulating a scenario of over-exploitation-driven  
87 extinction of all harvested species. We then evaluate (2) the robustness of this food-web to the  
88 extinction of species harvested by artisanal fisheries in comparison to three commonly used  
89 extinctions sequences (see below), and (3) the effect of three fisheries scenarios on other species  
90 abundance, persistence and food-web dynamics. We finally analyze the (4) independent and (5)  
91 combined effects of fisheries and plankton productivity changes on the food-web dynamics  
92 through altering plankton subsidy.

93 **RESULTS**

94 *1. Food-web description and the relative importance of harvested species to the food-web*  
95 *structure*

96           The intertidal food-web contains 107 species, with the highly omnivorous fisheries node  
97 (F node in Fig. 1A) contributing 22 links, from basal kelp species to top carnivores (Fig. 1A).  
98 Among the species harvested by the artisanal fisheries, 10 belong to the 30 most connected  
99 species of the food-web (Fig. 1A, and Supplementary Table S1). Moreover, these fisheries  
100 exploit at least one species that is a resource or a consumer of about 70% of the species  
101 (harvested and non-harvested species) in the intertidal food-web (Fig. 1B, C and D). With the  
102 static approach we found that the removal of all 22 species (see Methods) negatively affected the  
103 structural properties of the food-web, specially, reduces the overall number of trophic  
104 interactions by 48%. This loss represents, on average, 100 more links lost than that expected  
105 from randomly removing 22 species from the food-web (see supplementary Table S2 and  
106 supplementary material for more detailed results).

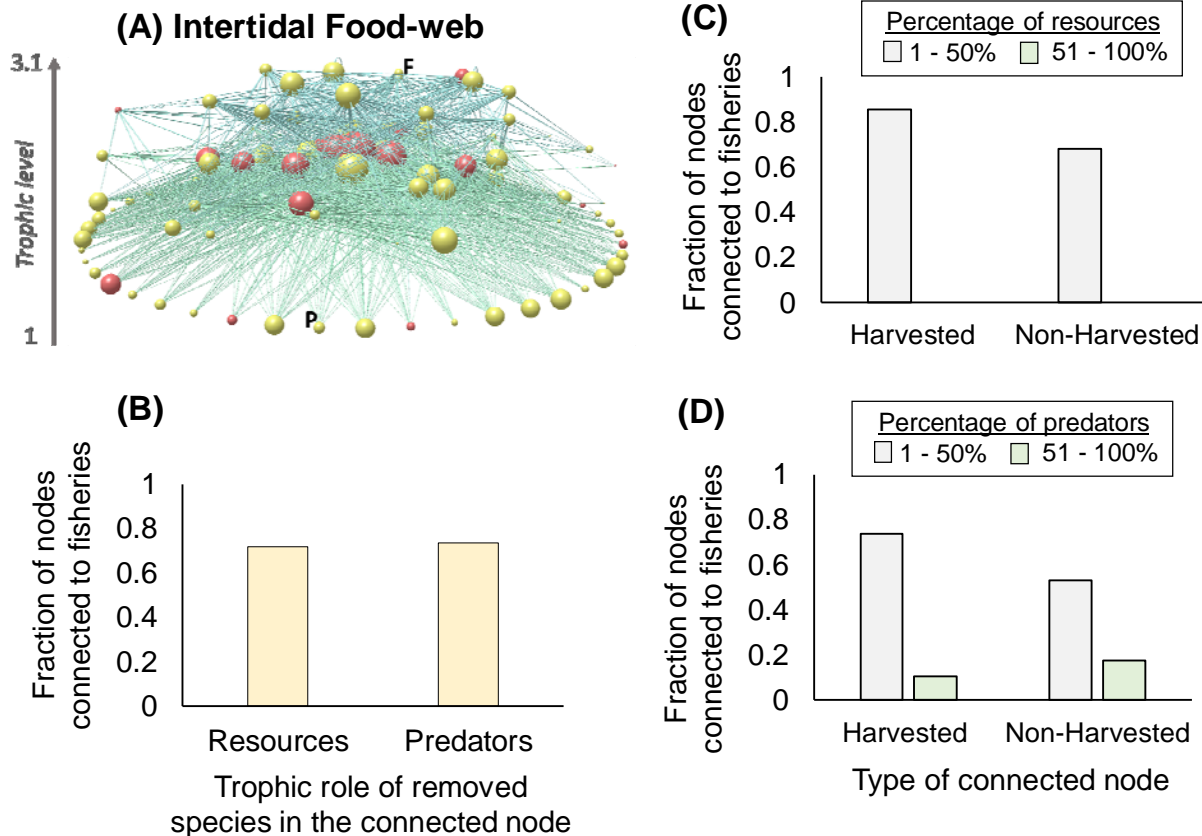

107

108

109 **Figure 1.** (A) Intertidal food-web. Node colors represent harvested (red) and non-harvested  
110 (yellow) species. Letter F and P represent the fisheries and plankton node, respectively. Node  
111 size represents the number of trophic interactions (degree) of each node. Nodes at the bottom  
112 represent basal species, while nodes at the top represent top predators. Y-axis represents trophic  
113 level (calculated as SWTL, see Methods). Drawn using Network3D software<sup>48</sup>. (B) Fraction of  
114 species in the food web that are trophically connected (at least once) with exploited species that  
115 are either a resource and/or a predator (x-axis). Each bar presented in (B) is further divided in:  
116 (C) the percentage of resources shared with fisheries by the harvested and non-harvested  
117 consumers of the food-web, and (D) the percentage of predators of harvested and non-harvested  
118 species extracted by fisheries. Grey and green bars, respectively, represent the categories of 1-  
119 50% and 51-100% of the resource species consumed by harvested and non-harvested species (C)  
120 and of the consumer species predating upon harvested and non-harvested species (D).

121

## 122 **2. Food-web robustness to species extinctions**

123       Following previous work<sup>38–41</sup>, we evaluated the robustness of the intertidal food-web to  
124 species extinction by sequentially removing species and counting the subsequent secondary  
125 extinctions, if any. We counted the secondary extinctions caused by the four deletion sequences  
126 (harvesting, random, most-connected, supporting-basal) using both static and dynamic  
127 approaches (see Methods). Our dynamic approach uses and extends the Allometric Trophic  
128 Network<sup>49,50</sup> (ATN) model by including plankton subsidy. Both approaches found that the  
129 intertidal food web is highly robust to the loss of all harvested species, as null secondary  
130 extinctions were observed after removing all harvested species (Fig. 2). The robustness of the  
131 intertidal food-web was further demonstrated by the sequential deletion of the most connected  
132 species, which showed that over 30% of those species must be removed before any secondary  
133 extinctions occur (Fig. 2). As expected from previous work, the loss of supporting-basal species  
134 produced the most secondary extinctions (Fig. 2). Both approaches showed similar trends (Fig.  
135 2A and B), but our dynamic approach presented relatively lower food-web robustness  
136 (Supplementary Fig. S1).

137       Although the plankton node (“species”) was directly connected only to filter-feeders, it  
138 proved to be the most important in the supporting-basal deletion sequence for both static and  
139 dynamic approaches, as its removal caused 15 and 29 secondary extinctions, respectively. The  
140 species that went extinct included not only sessile filter-feeders, but also four harvested species  
141 important for the fisheries: the Chilean muricid whelk *Concholepas concholepas*, the giant  
142 barnacle *Austromegabalanus pssitacus*, the sea squirt *Pyura chilensis* and the whelk *Acanthina*

143 *monodon*. These results suggest that while the intertidal food-web is robust to harvest-driven  
144 extinctions, it can be sensitive to a drastic decrease in plankton productivity.



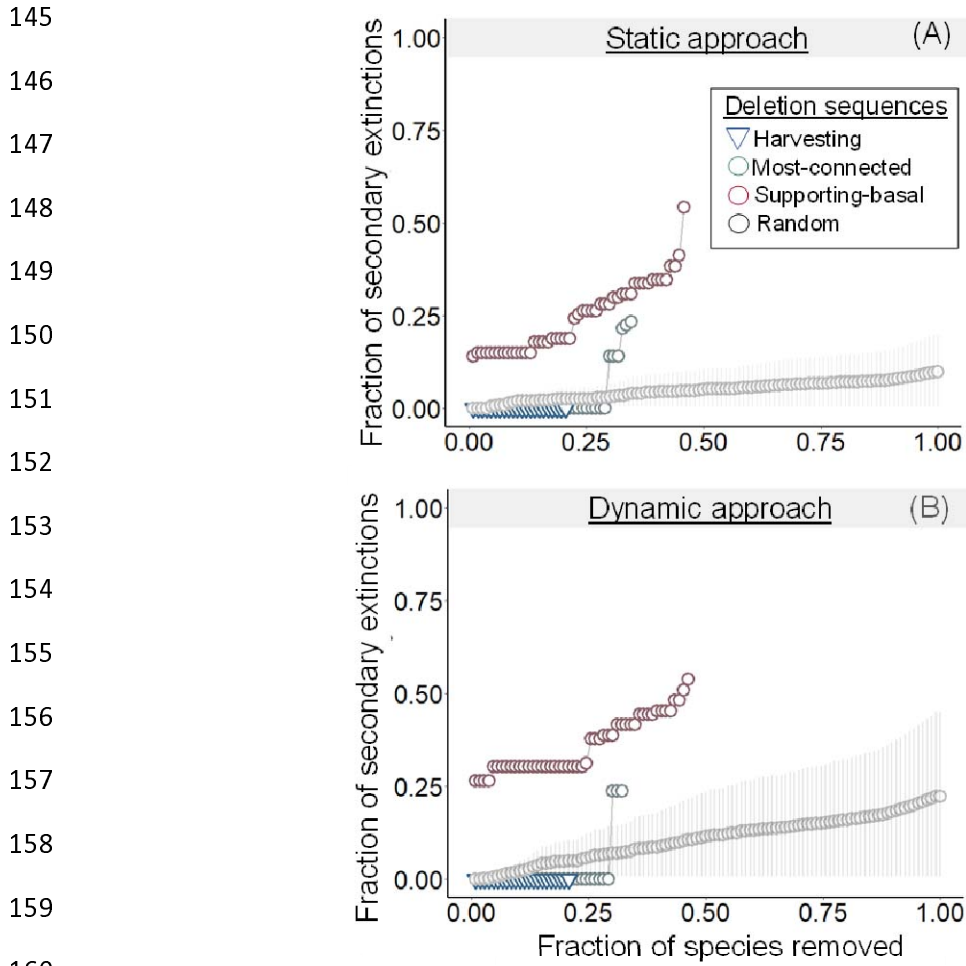

161 **Figure 2.** Fraction of secondary extinctions (y-axis) produced by the sequential removal of  
162 species (x-axis) with static (A) and dynamic (B) approaches. Gray and red circles represent  
163 most-connected and supporting-basal deletion sequences, while blue triangle represents harvesting  
164 deletion sequence. In the random deletion sequence, circles represent the average and the error  
165 bars represent the 95% confidence interval over 1000 simulations.

### 166 **3. Effects of artisanal fisheries on food-web dynamics**

167 We assessed the effects of fisheries on the biomass of every species in the food-web  
168 using our extension of the ATN model (see Methods). Fig. 3A and 3B illustrates with a  
169 simplified diagram our results shown in Supplementary Fig. S2. We simulated three fishing  
170 scenarios, where we applied exploitation rates needed to decrease the biomass of all 22 harvested  
171 species in 50%, 80%, and 100% (see  $F_{\max}$  in Supplementary Table S3). These three fishing

172 scenarios allowed us to simulate an approximately well managed fisheries (which removes  
173 between 40% and 60% of biomass stock<sup>5</sup>), an overexploitation scenario (which removes 80%)  
174 and nearly extinction scenario, respectively. We found that basal species required much lower  
175 exploitation rate to decrease their biomass than filter-feeders, herbivores, and other consumers  
176 (Supplementary Table S3). Harvested basals went extinct with an extraction above 0.3% of their  
177 available biomass, while harvested consumers went extinct with an extraction above 90% of their  
178 available biomass.

179         The decrease in biomass of harvested species led to an increase in the biomass of most  
180 non-harvested species at all trophic levels, especially in basal and herbivorous species (compare  
181 Figs. 3A and 3B). On average, 82-86% of non-harvested species increased their biomass by 5-  
182 25% after 50-100% fishing impacts on biomass stocks (Supplementary Fig. S2). This biomass  
183 increase is explained by two mechanisms: i) decreasing the biomass of harvested species that are  
184 consumers reduces the predation intensity on their resources (note that fisheries harvest more  
185 species in higher than lower trophic levels, compare Figs. 1D and 1C), and (ii) decreasing the  
186 biomass of harvested basal species reduces their competitive effects on the non-harvested basal  
187 species, allowing them to grow (Supplementary Fig. S3).

188         The positive effect of artisanal fisheries on the biomass of non-harvested species was  
189 qualitatively similar across the different fishing scenarios, becoming larger with an increase in  
190 fishing intensity (Supplementary Fig. S2). The exceptions were top predators, which had  
191 opposite responses between the weakest and strongest fishing scenarios. A 50% reduction in  
192 harvested species biomass caused a slight decrease in non-harvested top predators' biomass,  
193 while 80% and 100% reductions caused an increase in their biomass. This suggests that artisanal  
194 fisheries negatively impact top predators by extracting their prey species but, when the

195 exploitation rates are stronger, the indirect positive effects of fisheries on the biomass of the non-  
 196 harvested species become strong enough to dampen those effects.

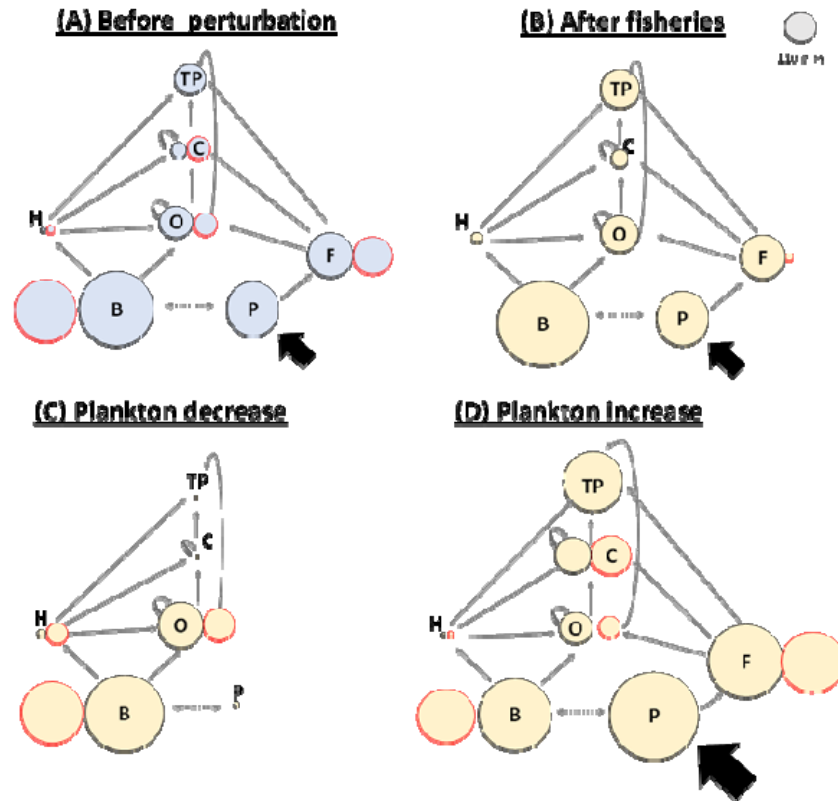

197  
 198 **Figure 3.** Diagram illustrating the effect of fisheries (B) and the effect of perturbing plankton  
 199 subsidy (C and D) on food-web dynamics. Nodes represent the total biomass of each trophic  
 200 level before (A) and after reducing in 100% the biomass of all harvested species (B) and after  
 201 decreasing (C) or increasing (D) plankton subsidy in 100%. Each trophic level is indicated by  
 202 TP: top predators, C: carnivores, O: omnivores, H: herbivores, F: filters-feeders, B: basal  
 203 species, and P: plankton. Red and black outlined nodes represent the biomass of harvested and  
 204 non-harvested species, respectively. Solid black, solid grey, and dashed grey arrows represent the  
 205 plankton subsidy ( $7355 \text{ g/m}^2$ ), the trophic interactions, and competitive interactions, respectively.  
 206 Note that the ATN model explicitly models competition only between basal species, while  
 207 competition between consumers emerges from the depletion of shared resources.

208

209 ***4. Effects of plankton-subsidy alteration on food-web dynamics***

210 We considered a subsidy term to plankton as an external-controlled subsidy of plankton  
211 productivity. We both decreased (Fig. 3C) and increased (Fig. 3D) the plankton subsidy in 50%,  
212 80%, and 100% to simulate the alteration of plankton productivity expected as a response of  
213 climate change (see Methods). All biomass changes can be found in Supplementary Fig. S4.  
214 Both decreasing (Fig. 3C) and increasing (Fig. 3D) plankton subsidy can deeply alter food web  
215 dynamics. The magnitude of plankton subsidy increases or decreases (i.e., 50%, 80%, 100%)  
216 only quantitatively affected the food-web patterns shown in Figs. 3C and 3D, becoming more  
217 intense with an increasing alteration of the plankton subsidy. Decreasing plankton subsidy had  
218 larger impacts on the species biomasses than increasing plankton subsidy in the same magnitude,  
219 even causing species extinctions (i.e., -1 in Supplementary Fig. S4E) when the subsidy was  
220 removed (i.e., decreased in 100%). The number of total extinctions that occurred after  
221 completely removing the plankton subsidy was 29 species, highlighting the bottom-up  
222 propagation of effects through the web (Supplementary Fig. S4E).

223 A drastic decrease in plankton subsidy (100%) resulted in the extinction of all filter-  
224 feeder species (specialist consumers of plankton) and decreased the biomass of carnivores and  
225 top predators by 99% (compare Figs. 3A and 3C). The biomass reduction in carnivores and top  
226 predators, in turn, released predation pressure on omnivores and herbivores, which consequently  
227 increased their biomass by 30% and 110%, respectively. The increased biomass of herbivores  
228 and omnivores, in turn, increased consumption pressure on basal species, but we found that the  
229 biomass of basal species slightly increased by 4% (Fig. 3C). This suggests that the reduction in  
230 plankton subsidy positively affects basal species by releasing pressure on the community level  
231 carrying capacity (see Methods). Conversely, a 100% increase in plankton subsidy increased the

232 total biomass of filters, carnivores, and top predators by 76%, 107%, and 105%, respectively  
233 (compare Figs. 3A and 3D). As a consequence, the increased predation pressure from higher  
234 trophic levels decreased the total biomass of omnivores, herbivores, and basal species by 2%,  
235 20%, and 3%, respectively. Carnivore species were the most vulnerable to the reduction of  
236 plankton productivity, going extinct with a reduction of 80% in plankton subsidy  
237 (Supplementary Fig. S4C), followed by filter-feeders and top predators, which went extinct with  
238 a 100% of subsidy reduction (Supplementary Fig. S4E). Regarding harvested species, 18% of  
239 them strongly decreased their biomass when plankton subsidy decreased, while 81% of them  
240 slightly decreased their biomass when plankton subsidy increased (compare Supplementary Figs.  
241 S4A, S4C, S4E with S4B, S4D, S4F).

## 242 ***5. Interacting effects of fisheries and plankton-subsidy alteration on food-web dynamics***

243 We evaluated the combined effects of the biomass extraction by fisheries and the  
244 alteration of plankton subsidy on the food-web dynamics using a full factorial design that  
245 maintains the same fishing and subsidy levels used in each of the last two sections. We found  
246 that regardless of the fishing scenario, all non-harvested trophic levels persisted when the  
247 plankton subsidy increased or decreased (Fig. 4A and B) by 50%. Conversely, when the plankton  
248 subsidy decreased in 80%, carnivores went extinct under all fishing scenarios (compare  
249 Supplementary Figs. S5C and D with S5A, B, E and F) as well as the top-predators and filter-  
250 feeders when the plankton subsidy decreased in 100% (Fig. 4C and D).

251 The level of plankton subsidy affected the impact of fishing on the biomass of harvested  
252 species. Decreasing plankton subsidy decreased the biomass of harvested carnivores and filter-  
253 feeders, intensifying the negative effect of fishing on their biomasses (see black arrows pointing  
254 down to such result for “Harvested Carnivores” in panels A and C of Fig. 4). The reverse

255 occurred when increasing plankton subsidy, which dampened the effect of fishing on the biomass  
 256 of harvested carnivores and filter-feeders. Interestingly, decreasing plankton subsidy also  
 257 increased the biomass of harvested and non-harvested omnivores and herbivores (see results of  
 258 subsection 2.3), which therefore dampened slightly the negative effect of fisheries on harvested  
 259 omnivores and herbivores (Fig. 4 A and C).

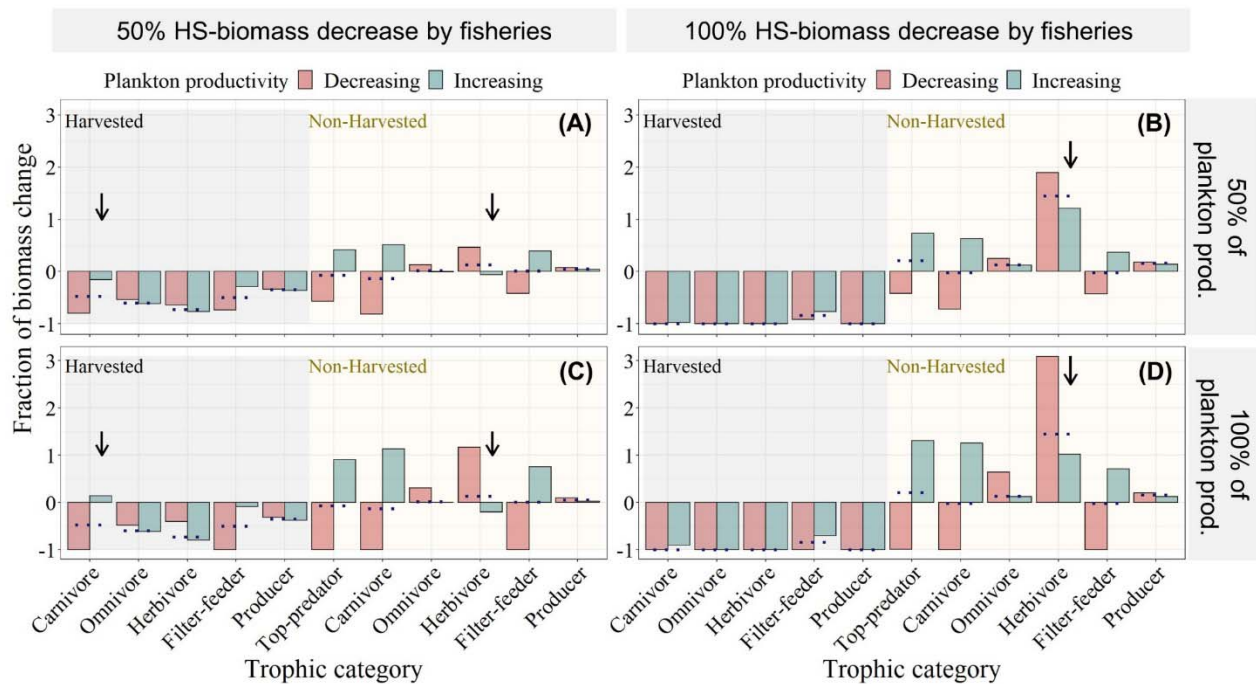

260 **Figure 4.** Combined effects of artisanal fisheries and plankton-productivity alterations on food-  
 261 web dynamics. Fraction of total biomass change (y-axis) of each trophic category (x-axis) after  
 262 decreasing (red bars) and increasing (blue bars) the plankton productivity (plankton prod.) in  
 263 50% (A and B) and 100% (C and D), and after decreasing the biomass of all harvested species  
 264 (HS) in a 50% (A and C) and in a 100% (B and D). The grey and yellow shading represent the  
 265 biomass change of harvested and non-harvested species, respectively. The arrows highlight the  
 266 most remarkable changes between the two levels of plankton subsidy perturbation and the two  
 267 levels of fishing. The dotted lines represent the independent effect fishing (i.e., without plankton  
 268 subsidy perturbation) on the biomass of each trophic category as a reference point.

269

270 Fisheries also affected the impacts of perturbing plankton subsidy on species biomasses.  
271 Increasing fishing increased the biomass of non-harvested species (see results of subsection 2.2)  
272 and, therefore, dampened the negative effects of altering plankton subsidy on the biomass of  
273 these species while intensifying the positive effects of altering plankton subsidy in those species  
274 (compare panels A and C with B and D of Fig. 4). Specifically, fisheries reversed the negative  
275 effect of increasing plankton subsidy on the biomass of non-harvested herbivores (see 4 black  
276 arrows pointing down to such result in panels A-C).

## 277 **DISCUSSION**

278 An overall decrease in marine plankton productivity is expected over global scales<sup>24,30,33</sup>  
279 as a result of climate change. Our results show that a decline in plankton productivity of the  
280 proportions expected with climate change can strongly impact an intertidal food-web in the  
281 Southern Pacific Coast. A decrease in plankton subsidy caused several species extinctions and  
282 shorten the food-web, with strong impacts on fisheries because of the biomass reduction of  
283 harvested species. Conversely, the simulated extinction of all harvested species caused null  
284 secondary extinctions, result that we also found in the subtidal food-web of the same Pacific  
285 Coast (see Supplementary Discussion and Supplementary Fig. S6). This despite artisanal  
286 fisheries harvesting on more than 20% of the food-web species (also highly connected species),  
287 which suggests that harvested species are embedded in redundant<sup>51</sup> trophic interactions,  
288 conferring the food-web alternative routes of energy and stability<sup>47,52</sup>. These results, however, do  
289 not imply that local fisher communities will be similarly tolerant to the extinction of harvested  
290 species. The socio-economic system in which fishers are embedded will be directly impacted<sup>53</sup> if  
291 resource management by local TURFs fails and drive the harvested species extinct (see  
292 Supplementary Discussion).

293 Our results also highlight the vulnerability of basal species to fishing. We found that  
294 basal species went extinct with an extraction above 0.3% of their available biomass. Harvested  
295 basal species are consumed by 2.5 more species than harvested consumers, and their intrinsic  
296 growth rate is 3 times lower than that of non-harvested basal species because they are the  
297 macroalgae that have the largest body size. Among the harvested basal species is kelp, which  
298 plays an important ecological and economical role. Kelp provides habitat structure and shelter to  
299 many species<sup>12</sup> and via this non-trophic interaction, it promotes the biodiversity of coastal  
300 ecosystems<sup>54</sup>. Its commercial value is also high, with Chile being one of the main exploiters of  
301 kelp natural populations<sup>55</sup>. Kelp extraction in Chile is managed but hardly supervised<sup>55</sup>.  
302 Therefore, kelp's high demand, high value, and low control, leave these algae prone to illegal  
303 fishing. In this context, we highlight the urgency of increasing supervision of kelp fisheries and  
304 enforcing their compliance with management plans.

305 We found that the effects on the food-web dynamics of coastal-productivity changes and  
306 artisanal fisheries interact, which reinforces the call made by previous studies<sup>56-58</sup> that more  
307 research is needed to understand the interaction of several environmental stressors on  
308 ecosystems. Fisheries dampened the negative impacts of decreasing plankton productivity on  
309 non-harvested species, while plankton-productivity decline increased the sensitivity of harvested  
310 species to fishing. Previous work<sup>59</sup> shows that human-gatherers enhance the species persistence  
311 of coastal marine ecosystems in the North Pacific. This suggests that, at least in the intertidal  
312 food-web studied here, small-scale artisanal fisheries play a similar role as human-gatherers in  
313 the North Pacific, that is, as keystone species to non-harvested species into the food-web.

314 Our study shows that the effects of climate change threaten the biodiversity of marine  
315 intertidal rocky-shore ecosystems as well as the services they provide, and emphasize the



316 relevance of understanding and predicting the population dynamics of plankton and their impacts  
317 on entire food-webs (see Supplementary Discussion). New strategies for these new scenarios  
318 caused by climate change are needed to also protect the economy and wellbeing of the local  
319 communities dependent on these coastal ecosystems.

## 320 **METHODS**

### 321 *Food-web description and the relative importance of harvested species to the food-web* 322 *structure*

323 We studied a well-resolved food-web of the intertidal rocky shore communities of the  
324 central coast of Chile<sup>12</sup>, which is harvested exclusively by small scale artisanal fisheries<sup>11</sup>. The  
325 web represents all species that are found to co-occur on wave exposed rocky platforms of central  
326 Chile, from the very low to the highest intertidal and is composed of 107 species (including a  
327 fisheries node), with 44% of its species corresponding to primary producers, 53% to  
328 invertebrates, and 3% to endotherm vertebrates. In the food-web, we consider as basal level all  
329 species of benthic primary producers plus plankton (phytoplankton + zooplankton, single node).  
330 Therefore, we represented filter-feeders (sessile filter-feeders + porcenallidae crabs) as specialist  
331 consumers of plankton and not as basal species (see detailed description of the food-web in  
332 Supplementary Material).

333 Species harvested by artisanal fisheries were identified using information from the  
334 Chilean national fishing service ([www.sernapesca.cl](http://www.sernapesca.cl)) and previous work<sup>13</sup>. A high diversity of  
335 species distributed across all trophic levels are harvested by artisanal fisheries (red nodes in Fig.  
336 1), including numerous species of macroalgae (n= 7), filter-feeders (n= 2), herbivores and  
337 omnivorous (n= 11), and carnivores (n= 2), totaling 22 species. Using the static approach

338 (without population dynamics, see nest subsection), we compared the structure of the food-web  
339 with and without the harvested species to the distribution of 1000 food-web structures produced  
340 by randomly removing the same amount of harvested species (see more details about this method  
341 in supplementary materials).

### 342 *Static and dynamic approaches for evaluating food-web robustness*

343 The static approach stems from network theory and analyzes the impacts of structural  
344 changes on food-webs represented by nodes (species) and links (interactions) that connect nodes,  
345 but ignores interaction strengths and population dynamics of interacting species<sup>38</sup>. In this  
346 approach, a non-basal species is considered extinct after a perturbation (defined here as a  
347 secondary extinction) if all its resource species (food) go extinct. Basal species are assumed to be  
348 autotrophs or otherwise obtain resources from outside the modeled web, e.g. through subsidies  
349 from other ecosystems and, therefore, do not experience extinctions unless directly removed  
350 (defined here as a primary extinctions). Thus, the static approach only considers extinctions  
351 produced by direct bottom-up effects. A dynamic approach considers not only the structure and  
352 intensity of interactions in a food-web, but also the changes in species abundances through time  
353 and the indirect and dynamic effects that these changes have on the abundances of other  
354 species<sup>39-41,46,47</sup>. A species is then considered to be secondarily extinct when its abundance drops  
355 below a threshold as a consequence of its population losses being higher than its population  
356 gains. Therefore, a dynamic approach can take into account both bottom-up and top-down effects  
357 of perturbations on the system, and both forces can contribute to produce secondary  
358 extinctions<sup>39</sup>. We use both the static network-based approach and a dynamic approach based on  
359 energy-transfer (see dynamic model below) to evaluate the impacts of artisanal fisheries and  
360 changes in primary productivity on the intertidal food-web.

361 ***The dynamic model***

362 The Allometric Trophic Network (ATN) model<sup>49,50</sup> consists of two basic sets of  
 363 equations, one set describing the biomass changes of primary producers (eq. 1) and the other  
 364 describing that of consumers (eq. 2), where  $\mathbf{B}$  is the biomass vector with the biomasses of every  
 365 species population in the food-web and  $B_i$  is the biomass of the population of species  $i$ , as  
 366 follows:

$$367 \quad \frac{dB_i}{dt'} = \overbrace{r_i B_i G_i(\mathbf{B})}^{\text{Autotrophic growth gain}} - \overbrace{\sum_j \frac{x_j y_{ji} B_j F_{ji}(\mathbf{B})}{e_{ji}}}_{\text{Herbivory loss}} - \overbrace{F_{\max i} B_i}_{\text{Fisheries loss}} \quad (\text{eq. 1})$$

$$368 \quad \frac{dB_i}{dt'} = \overbrace{f_a x_i B_i \sum_j y_{ij} F_{ij}(\mathbf{B})}_{\text{Resources consumption gain}} - \overbrace{f_m x_i B_i}_{\text{Maintenance loss}} - \overbrace{\sum_j \frac{x_j y_{ji} B_j F_{ji}(\mathbf{B})}{e_{ji}}}_{\text{Predation loss}} - \overbrace{F_{\max i} B_i}_{\text{Fisheries loss}} \quad (\text{eq. 2})$$

369 The biomass of producer  $i$  changes according to the balance of autotrophic growth gain  
 370 and losses due to predation. The net autotrophic growth is determined by the logistic growth  
 371 function  $G_i(B) = 1 - (\sum_{j=\text{productores}} c_{ij} B_j)/K$ , where  $r_i$  is the intrinsic growth rate of producer  
 372  $i$ ,  $c_{ij}$  is the inter-specific competition coefficient between producer  $i$  and  $j$ , and  $K$  is the total  
 373 carrying capacity of primary producers in the system. The biomass loss of producer  $i$  by  
 374 herbivory (caused by herbivores or omnivores) increases with the mass-specific metabolic ( $x_j$ )  
 375 and attack ( $y_j$ ) rates of consumer  $i$ , and decreases with the assimilation efficiency of consumer  $i$   
 376 for resource  $j$  ( $e_{ij}$ ). The consumers' population dynamics (eq. 2) depend on their mass-specific  
 377 metabolic rates ( $x_j$ ) and on the balance between biomass gains by resource consumption, biomass  
 378 loss by metabolic maintenance, and biomass loss to predation. From the total amount of  
 379 resources ingested by the consumer population  $i$ ,  $\sum_j y_{ij} F_{ij}(\mathbf{B})$ , only a fraction  $f_a$  is assimilated

380 into consumer available energy for maintenance and biomass growth. The functional response  
381  $F_{ij}(\mathbf{B})$  determines the consumption rate of each consumer  $i$  for each resource  $j$ , defined by:

$$382 \quad F_{ij}(\mathbf{B}) = \frac{\omega_{ij} B_j^q}{B_0_{ij}^q + d_i B_i B_0_{ij} + \sum_{l=\text{resources}} \omega_{il} B_l^q} \quad (\text{eq. 3})$$

383 where  $\omega_{ij}$  is the relative preference of consumer  $i$  for resource  $j$ ,  $q$  controls the shape of eq. 3  
384 which becomes an intermediate functional response between type II and type III when  $q=1.2$ <sup>60</sup>.  
385  $B_0_{ij}$  is the biomass of resource  $j$  at which the consumer  $i$  achieves half of its maximum  
386 consumption rate on resource  $j$ , and  $d_i$  is the intra-specific interference of consumer  $i$  when it  
387 forages resource  $j$ . In Eq. 2,  $f_m$  defines the fraction of the consumer biomass that is respired for  
388 maintenance of basal metabolism.  $F_{max}$  defines the fraction of biomass  $i$  that is removed by  
389 small-scale artisanal fisheries. In the case of non-harvested species  $F_{max} = 0$ .

390 The biological rates of production,  $R$ , metabolism,  $X$ , and maximum consumption,  $Y$ ,  
391 follow a negative power law with the species body size, with an exponent  $-1.4$ <sup>61</sup>:

$$392 \quad R_P = a_r M_P^{-0.25} \quad (\text{eq. 4})$$

$$393 \quad X_C = a_x M_C^{-0.25} \quad (\text{eq. 5})$$

$$394 \quad Y_C = a_y M_C^{-0.25} \quad (\text{eq. 6})$$

395 Where  $a_r$ ,  $a_x$ , and  $a_y$  are allometric constants and the subscripts P and C denote producers  
396 and consumers, respectively. The timescale to examine the dynamics of the system is defined  
397 based on the primary producer with the highest mass-specific growth rate (reference species).  
398 The mass-specific growth rate and the metabolic rate of each species were normalized by the  
399 growth rate of the reference species, and the maximum consumption rate was normalized by  
400 each species' metabolic rate<sup>61</sup>. These normalizations translate to the following expressions of

401 intrinsic growth rate ( $r_i$ ), metabolic rate ( $x_i$ ), and maximum consumption rate ( $y_i$ ) of each species  
402  $i$ :

$$403 \quad r_i = \frac{R_P}{R_{P_{ref}}} = 1 \left( \frac{M_P}{M_{P_{ref}}} \right)^{-0.25} \quad (\text{eq. 7})$$

$$404 \quad x_i = \frac{X_C}{R_{P_{ref}}} = \frac{a_x}{a_r} \left( \frac{M_C}{M_{P_{ref}}} \right)^{-0.25} \quad (\text{eq. 8})$$

$$405 \quad y_i = \frac{Y_C}{X_C} = \frac{a_y}{a_x} \quad (\text{eq. 9})$$

406           Since most benthic marine communities are characterized by the presence of sessile  
407 filter-feeders at the bottom, these communities are heavily ‘subsidized’ by the pelagic  
408 phytoplankton, which is captured by filter-feeders and transferred up the benthic food web<sup>62</sup>. In  
409 general, phytoplankton dynamics is thought to vary primarily due to ‘external processes’ (e.g.  
410 water advection, nutrient loadings, etc.), including climate fluctuations<sup>34</sup>. To account for this  
411 phenomenon, our implementation of the ATN model assumed that the intertidal community is  
412 permanently subsidized by plankton biomass. Therefore, we modeled plankton dynamic as a  
413 primary producer (eq. 1) and following [75, 76] we incorporated a constant subsidy  $s$  into the  
414 plankton dynamics as:

$$415 \quad \frac{dB_i}{dt_i} = d_{local} + s, \quad (\text{eq. 10})$$

416 where  $d_{local}$  represents plankton local dynamics (i.e., right hand of eq. 1).

417

418           To our knowledge, the ATN model we develop here is the largest empirical dynamic  
419 food-web model ever parameterized (our intertidal food-web contains 107 species, see model

420 parametrization in supplementary materials and parameters values in Supplementary Table S4),  
421 which by itself represents an advancement in food web modeling. Moreover, the added realism  
422 of plankton subsidy allows us to simulate the effect of climate-change driven effects described  
423 above as the alteration of such subsidy.

#### 424 ***Food-web robustness to species extinctions***

425         Using the static and dynamic approaches (see the model above), we evaluated the food-  
426 web robustness to species extinctions using four deletion sequences. First, we evaluated the  
427 food-web robustness to the extinction of harvested species by removing them in descending  
428 order of total catch amount (hereafter “harvesting” deletion sequence), according to the Chilean  
429 national fishing service ([www.sernapesca.cl](http://www.sernapesca.cl)). Second, we performed three additional deletion  
430 sequences: (1) randomly (hereafter “random” deletion sequence), (2) from the most to the least  
431 connected species (hereafter “most-connected” deletion sequence<sup>38,41</sup>), and (3) from the most  
432 connected species that trophically support highly connected species to the least connected  
433 species supporting low connected species<sup>42</sup>. This last sequence causes the fastest route of  
434 collapse<sup>42</sup> by first deleting the basal species that support most of the species in the food-web  
435 (hereafter “supporting-basal” deletion sequence). These last three deletion sequences allow us to  
436 compare the food-web sensitivity to the extinction of harvested species with that to the extinction  
437 of other species, and to identify the most important species for food-web persistence. For the  
438 harvesting deletion sequence, species were removed until all the harvested species were deleted,  
439 while for all other sequences the procedure was repeated until all species were removed  
440 (including the harvested species). In the case of species with an equal number of interactions, the  
441 removed species was chosen at random<sup>40</sup>.

442 To compare the food-web robustness across the different patterns of species deletion,  
443 except the “harvesting” deletion sequence, we use the  $R_{50}$  index<sup>38</sup>. For the harvesting deletion  
444 sequence, only the number of secondary extinctions was registered. The  $R_{50}$  index represents the  
445 proportion of species that have to be removed to cause the extinction of 50% of the species in the  
446 network (including primary and secondary extinctions). The highest and lowest possible values  
447 of  $R_{50}$  are 0.5 and  $1/S$ , respectively ( $S$  is the number of species in the network), which are  
448 reached when no secondary extinctions are caused by species deletions and when only one  
449 primary species deletion is needed to cause the extinction of 50% of species, respectively. Thus,  
450 larger values of  $R_{50}$  mean higher robustness. The static approach was simulated using the R  
451 package *NetworkExtinction*<sup>63</sup>, while the dynamical model was simulated using ODE45 in  
452 MATLAB.

453 For the dynamic approach, we first ran the dynamic model for 3650 time-steps which  
454 corresponds to 10 years, and ensures that the food-web reached a dynamic equilibrium. Then, we  
455 started the removal simulations. In each removal step, the number of extinct species was  
456 recorded after 10 years, when the system had reached, again, a steady state. A species was  
457 considered extinct if its biomass diminished to less than  $10^{-6}$  [64]. Note that in all deletion  
458 sequences we removed the nodes from the food-web, so in the harvesting deletion sequence the  
459  $F_{\max}$  parameter in the ATN model is zero to all harvested species.

#### 460 *Effects of artisanal fisheries on food-web dynamics*

461 We assessed the effects of artisanal fisheries on food-web dynamics by simulating  
462 simultaneous fishing on all harvested species and assessing the subsequent effects on the  
463 biomass of all species in the food-web. We simulated three fishing scenarios, where we applied  
464 exploitation rates needed to decrease the biomass of all harvested species in 50%, 80%, and

465 100% (see  $F_{\max}$  in Supplementary Table S3). Note that basal species required much lower  
466 exploitation rate to decrease their biomass (see discussion) than filter-feeders, herbivores, and  
467 other consumers, which means that harvested basal species were the most sensitive species to  
468 fishing. Note also that a biomass decrease of 100% does not necessarily mean that the harvested  
469 species go extinct, because the biomass available to be removed by fishing is the biomass that  
470 was produced a time step earlier (i.e., fishing exploitation is simulated as part of the population  
471 dynamics of harvested species, see eqs. 1 and 2). These three fishing scenarios allowed us to  
472 simulate an approximately well managed fisheries (which removes between 40 and 60% of  
473 biomass stock<sup>5</sup>), an overexploitation scenario (which removes 80%) and nearly extinction  
474 scenario, which allowed us to assess overall stability if all harvested species go extinct. For each  
475 fishing scenario, we first ran the model for 10 years (3650 time-steps) to ensure that the system  
476 reached a dynamic equilibrium. Then, we applied the biomass removal ( $F_{\max i} B_i$  in eqs. 1 and 2) at  
477 each time step in the model to all harvested species simultaneously and we ran the food-web  
478 dynamics for another 3650 time-steps to reach post perturbation equilibrium, when final  
479 biomasses were considered “after perturbation” state.

480 In each treatment and for each species  $i$ , we evaluated the effect of the simulated scenario  
481 as:

$$482 \quad \text{Biomass change}_i = \left[ \left( \frac{\text{after perturbation}_i}{\text{before perturbation}_i} \right) - 1 \right] * 100 \quad (\text{eq. 11})$$

483

#### 484 ***Effects of plankton subsidy alteration on food-web dynamics***

485 We assume that the food-web is subsidized by an external source, by including a subsidy  
486 in the plankton node, which is considered to be controlled by advective processes, unaffected by



487 local benthic consumption. This represents well the situation of most marine benthic  
488 ecosystems<sup>62</sup>. To compare the top-down effects of fisheries against bottom-up variation in  
489 productivity, we perturbed the plankton subsidy to simulate climate-induced changes in plankton  
490 productivity. We simulated both a decrease and an increase in plankton subsidy, as both long-  
491 term increased and decreased productivity has been documented to occur in the Humboldt  
492 Ecosystem<sup>34</sup>. We used three different perturbation intensities, decreasing or increasing basal  
493 subsidy in 50%, 80% and 100%. Note that, a 100% in the basal plankton subsidy decreasing does  
494 not translate into plankton extinction (Fig. 3C). A variation of 50% of the basal subsidy is in the  
495 order of natural seasonal variability of net primary productivity in central Chile<sup>31</sup>. We assumed  
496 that a variation above 50% simulates the effects of extreme changes of plankton subsidy due to  
497 climate change, and also, such magnitudes allow comparable perturbation intensities to those  
498 used to assess the impacts of fisheries on the food-web dynamics (see previous section). In each  
499 scenario, we first ran the model for 3650 time-steps to ensure that the system reached a dynamic  
500 equilibrium, and the final species biomasses obtained were considered “*before perturbation*”  
501 state. Then, we reduced/increased plankton subsidy at each time step and ran the model for  
502 another 3650 time-steps to reach post perturbation equilibrium. The final biomasses were  
503 considered “*after perturbation*” state. Changes in biomass were expressed as shown in Eq.11.

#### 504 ***Interacting effects of fisheries and plankton-subsidy alteration on food-web dynamics***

505 To evaluate combined effects of fisheries and climate-induced changes in plankton  
506 subsidy, we simulated both fishing on all harvested species and simultaneously altered plankton  
507 subsidy. We used the three fisheries scenarios (i.e., 50%, 80% and 100% biomass removed) and  
508 crossed these scenarios with each of the six productivity scenarios (i.e., increasing or decreasing  
509 plankton subsidy in 50%, 80% and 100%). In each treatment, we first ran the model for 3650

510 time-steps and the final species biomasses obtained were considered “*before perturbation*” state.  
511 Then, we applied a given plankton subsidy scenario, and at the same time, we started the fishing  
512 simulations. Changes in biomass were expressed as shown in Eq.11.

513 **DATA AVAILABILITY:** Simulation code and the Chilean intertidal data will be available  
514 upon acceptance at the repository [https://github.com/fsvaldovinos/Chilean Fisheries](https://github.com/fsvaldovinos/Chilean_Fisheries). The  
515 Chilean intertidal food-web and species body sizes can also be found in<sup>12</sup>

516 **References:**

- 517 1. Barnosky, A. D. *et al.* Has the Earth’s sixth mass extinction already arrived?. *Nature* **471**, 51–57  
518 (2011).
- 519 2. McCauley, D. J. *et al.* Marine defaunation: Animal loss in the global ocean. *Science* **347**, 1255641–  
520 1255641 (2015).
- 521 3. Chapin III, F. S. *et al.* Consequences of changing biodiversity. *Nature* **405**, 234–242 (2000).
- 522 4. Díaz, S., Fargione, J., Chapin, F. S. & Tilman, D. Biodiversity Loss Threatens Human Well-Being. *PLoS*  
523 *Biol.* **4**, e277 (2006).
- 524 5. Worm, B. *et al.* Rebuilding Global Fisheries. *Science* **325**, 578–585 (2009).
- 525 6. Defeo, O. & Castilla, J. C. More than One Bag for the World Fishery Crisis and Keys for Co-  
526 management Successes in Selected Artisanal Latin American Shellfisheries. *Rev. Fish Biol. Fish.* **15**,  
527 265–283 (2005).
- 528 7. Pauly, D. & Zeller, D. Catch reconstructions reveal that global marine fisheries catches are higher  
529 than reported and declining. *Nat. Commun.* **7**, 10244 (2016).
- 530 8. Defeo, O. *et al.* Co-management in Latin American small-scale shellfisheries: assessment from long-  
531 term case studies. *Fish Fish.* **17**, 176–192 (2016).
- 532 9. Gelcich, S. *et al.* Fishers’ perceptions on the Chilean coastal TURF system after two decades:  
533 problems, benefits, and emerging needs. *Bull. Mar. Sci.* **93**, 53–67 (2017).

- 534 10. Castilla, J. C., Gelcich, S. & Defeo, O. Successes, Lessons, and Projections from Experience in Marine  
535 Benthic Invertebrate Artisanal Fisheries in Chile. in *Fisheries Management* (eds. McClanahan, T. R. &  
536 Castilla, J. C.) 23–42 (Blackwell Publishing Ltd, 2007). doi:10.1002/9780470996072.ch2.
- 537 11. Gelcich, S. *et al.* Navigating transformations in governance of Chilean marine coastal resources.  
538 *Proc. Natl. Acad. Sci.* **107**, 16794–16799 (2010).
- 539 12. Kéfi, S. *et al.* Network structure beyond food webs: mapping non-trophic and trophic interactions on  
540 Chilean rocky shores. *Ecology* **96**, 291–303 (2015).
- 541 13. Pérez-Matus, A. *et al.* Temperate rocky subtidal reef community reveals human impacts across the  
542 entire food web. *Mar. Ecol. Prog. Ser.* **567**, 1–16 (2017).
- 543 14. Pérez-Matus, A., Carrasco, S. A., Gelcich, S., Fernandez, M. & Wieters, E. A. Exploring the effects of  
544 fishing pressure and upwelling intensity over subtidal kelp forest communities in Central Chile.  
545 *Ecosphere* **8**, e01808 (2017).
- 546 15. Gelcich, S. *et al.* Territorial User Rights for Fisheries as Ancillary Instruments for Marine Coastal  
547 Conservation in Chile: *Gelcich et al.* *Conserv. Biol.* **26**, 1005–1015 (2012).
- 548 16. Oyanedel, R., Keim, A., Castilla, J. C. & Gelcich, S. Illegal fishing and territorial user rights in Chile:  
549 Illegal Fishing. *Conserv. Biol.* **32**, 619–627 (2018).
- 550 17. Donlan, C. J., Wilcox, C., Luque, G. M. & Gelcich, S. Estimating illegal fishing from enforcement  
551 officers. *Sci. Rep.* **10**, 12478 (2020).
- 552 18. Andreu-Cazenave, M., Subida, M. D. & Fernandez, M. Exploitation rates of two benthic resources  
553 across management regimes in central Chile: Evidence of illegal fishing in artisanal fisheries  
554 operating in open access areas. *PLOS ONE* **12**, e0180012 (2017).
- 555 19. Castilla, J. C. Coastal marine communities: trends and perspectives from human-exclusion  
556 experiments. *Trends Ecol. Evol.* **14**, 280–283 (1999).

- 557 20. Somero, G. N. The physiology of climate change: how potentials for acclimatization and genetic  
558 adaptation will determine ‘winners’ and ‘losers’. *J. Exp. Biol.* **213**, 912–920 (2010).
- 559 21. Hoegh-Guldberg, O. & Bruno, J. F. The Impact of Climate Change on the World’s Marine Ecosystems.  
560 *Science* **328**, 1523–1528 (2010).
- 561 22. Brose, U. *et al.* Climate change in size-structured ecosystems. *Philos. Trans. R. Soc. B Biol. Sci.* **367**,  
562 2903–2912 (2012).
- 563 23. Doney, S. C. *et al.* Climate Change Impacts on Marine Ecosystems. *Annu. Rev. Mar. Sci.* **4**, 11–37  
564 (2012).
- 565 24. Kwiatkowski, L., Aumont, O. & Bopp, L. Consistent trophic amplification of marine biomass declines  
566 under climate change. *Glob. Change Biol.* **25**, 218–229 (2019).
- 567 25. Bakun, A. Coastal Ocean Upwelling. *Science* **247**, 198–201 (1990).
- 568 26. Bakun, A., Field, D. B., Redondo-Rodriguez, A. & Weeks, S. J. Greenhouse gas, upwelling-favorable  
569 winds, and the future of coastal ocean upwelling ecosystems. *Glob. Change Biol.* **16**, 1213–1228  
570 (2010).
- 571 27. Thiel, M. *et al.* The Humboldt current system of northern and central Chile: oceanographic  
572 processes, ecological interactions and socioeconomic feedback. in *Oceanography and Marine*  
573 *Biology* (eds. Gibson, R., Atkinson, R. & Gordon, J.) vol. 20074975 195–344 (CRC Press, 2007).
- 574 28. Morales, C., Hormazabal, S., Andrade, I. & Correa-Ramirez, M. Time-Space Variability of Chlorophyll-  
575 a and Associated Physical Variables within the Region off Central-Southern Chile. *Remote Sens.* **5**,  
576 5550–5571 (2013).
- 577 29. Aiken, C. M., Navarrete, S. A. & Pelegrí, J. L. Potential changes in larval dispersal and alongshore  
578 connectivity on the central Chilean coast due to an altered wind climate. *J. Geophys. Res.* **116**,  
579 G04026 (2011).

- 580 30. Blanchard, J. L. *et al.* Potential consequences of climate change for primary production and fish  
581 production in large marine ecosystems. *Philos. Trans. R. Soc. B Biol. Sci.* **367**, 2979–2989 (2012).
- 582 31. Testa, G., Masotti, I. & Fariás, L. Temporal variability in net primary production in an upwelling area  
583 off central Chile (36°S). *Front. Mar. Sci.* **5**, 179 (2018).
- 584 32. Batten, S. D. *et al.* A Global Plankton Diversity Monitoring Program. *Front. Mar. Sci.* **6**, 321 (2019).
- 585 33. Chust, G. *et al.* Biomass changes and trophic amplification of plankton in a warmer ocean. *Glob.*  
586 *Change Biol.* **20**, 2124–2139 (2014).
- 587 34. Weidberg, N. *et al.* Spatial shifts in productivity of the coastal ocean over the past two decades  
588 induced by migration of the Pacific Anticyclone and Bakun’s effect in the Humboldt Upwelling  
589 Ecosystem. *Glob. Planet. Change* **193**, 103259 (2020).
- 590 35. Aguirre, C., García-Loyola, S., Testa, G., Silva, D. & Farias, L. Insight into anthropogenic forcing on  
591 coastal upwelling off south-central Chile. *Elem Sci Anth* **6**, 59 (2018).
- 592 36. Valdovinos, F. S. Mutualistic networks: moving closer to a predictive theory. *Ecol. Lett.* **22**, 1517–  
593 1534 (2019).
- 594 37. Pascual, M. & Dunne, J. A. *Ecological Networks: Linking Structure to Dynamics in Food Webs (Santa*  
595 *Fe Institute Studies on the Sciences of Complexity)*. (Oxford University Pres, 2006).
- 596 38. Dunne, J. A., Williams, R. J. & Martinez, N. D. Network structure and biodiversity loss in food webs:  
597 robustness increases with connectance. *Ecol. Lett.* **5**, 558–567 (2002).
- 598 39. Curtsdotter, A. *et al.* Robustness to secondary extinctions: Comparing trait-based sequential  
599 deletions in static and dynamic food webs. *Basic Appl. Ecol.* **12**, 571–580 (2011).
- 600 40. Ramos-Jiliberto, R., Valdovinos, F. S., Moisset de Espanés, P. & Flores, J. D. Topological plasticity  
601 increases robustness of mutualistic networks: Interaction rewiring in mutualistic networks. *J. Anim.*  
602 *Ecol.* **81**, 896–904 (2012).

- 603 41. Valdovinos, F. S., Moisset de Espanés, P., Flores, J. D. & Ramos-Jiliberto, R. Adaptive foraging allows  
604 the maintenance of biodiversity of pollination networks. *Oikos* **122**, 907–917 (2013).
- 605 42. Allesina, S. & Pascual, M. Googling Food Webs: Can an Eigenvector Measure Species' Importance for  
606 Coextinctions?. *PLoS Comput. Biol.* **5**, e1000494 (2009).
- 607 43. de Santana, C., Rozenfeld, A., Marquet, P. & Duarte, C. Topological properties of polar food webs.  
608 *Mar. Ecol. Prog. Ser.* **474**, 15–26 (2013).
- 609 44. Albert, R., Jeong, H. & Barabási, A. Error and attack tolerance of complex networks. *Nature* **406**,  
610 378–382 (2000).
- 611 45. Ives, A. R. & Cardinale, B. J. Food-web interactions govern the resistance of communities after non-  
612 random extinctions. *Nature* **429**, 174–177 (2004).
- 613 46. Rebolledo, R., Navarrete, S. A., Kéfi, S., Rojas, S. & Marquet, P. A. An open-system approach to  
614 complex biological networks. *SIAM J. Appl. Math.* **79**, 619–640 (2019).
- 615 47. McCann, K. S. The diversity–stability debate. *Nature* **405**, 228–233 (2000).
- 616 48. Williams, Rich J. Network 3D: visualizing and modelling food webs and other complex networks.  
617 *Microsoft Res. Camb. UK* (2010).
- 618 49. Richard, J. W., Brose, U. & Martinez, N. D. Homage to Yodzis and Innes 1992: Scaling up feeding-  
619 based population dynamics to complex ecological networks. in *From Energetics to Ecosystems: The*  
620 *Dynamics and Structure of Ecological Systems* 37–51 (Springer Netherlands, 2006). doi:10.1007/978-  
621 1-4020-5337-5\_2.
- 622 50. Boit, A., Martinez, N. D., Williams, R. J. & Gaedke, U. Mechanistic theory and modelling of complex  
623 food-web dynamics in Lake Constance: Mechanistic modelling of complex food web dynamics. *Ecol.*  
624 *Lett.* **15**, 594–602 (2012).
- 625 51. Jordán, F., Okey, T. A., Bauer, B. & Libralato, S. Identifying important species: Linking structure and  
626 function in ecological networks. *Ecol. Model.* **216**, 75–80 (2008).

- 627 52. Arim, M. & Marquet, P. A. Intraguild predation: a widespread interaction related to species biology:  
628 Intraguild predation. *Ecol. Lett.* **7**, 557–564 (2004).
- 629 53. Castilla, J. C. & Fernandez, M. Small-scale benthic fisheries in Chile: on co-management and  
630 sustainable use of benthic invertebrates. *Ecol. Appl.* **8**, S124–S132 (1998).
- 631 54. Teagle, H., Hawkins, S. J., Moore, P. J. & Smale, D. A. The role of kelp species as biogenic habitat  
632 formers in coastal marine ecosystems. *J. Exp. Mar. Biol. Ecol.* **492**, 81–98 (2017).
- 633 55. Vásquez, J. A. The Brown Seaweeds Fishery in Chile. in *Fisheries and Aquaculture in the Modern*  
634 *World* (ed. Mikkola, H.) (InTech, 2016). doi:10.5772/62876.
- 635 56. He, Q. & Silliman, B. R. Climate Change, Human Impacts, and Coastal Ecosystems in the  
636 Anthropocene. *Curr. Biol.* **29**, R1021–R1035 (2019).
- 637 57. Brown, C. J., Saunders, M. I., Possingham, H. P. & Richardson, A. J. Interactions between global and  
638 local stressors of ecosystems determine management effectiveness in cumulative impact mapping.  
639 *Divers. Distrib.* **20**, 538–546 (2014).
- 640 58. Crain, C. M., Kroeker, K. & Halpern, B. S. Interactive and cumulative effects of multiple human  
641 stressors in marine systems. *Ecol. Lett.* **11**, 1304–1315 (2008).
- 642 59. Dunne, J. A. *et al.* The roles and impacts of human hunter-gatherers in North Pacific marine food  
643 webs. *Sci. Rep.* **6**, 21179 (2016).
- 644 60. Williams, R. J. Effects of network and dynamical model structure on species persistence in large  
645 model food webs. *Theor. Ecol.* **1**, 141–151 (2008).
- 646 61. Brose, U., Williams, R. J. & Martinez, N. D. Allometric scaling enhances stability in complex food  
647 webs. *Ecol. Lett.* **9**, 1228–1236 (2006).
- 648 62. Menge, B. A. & Menge, D. N. L. Dynamics of coastal meta-ecosystems: the intermittent upwelling  
649 hypothesis and a test in rocky intertidal regions. *Ecol. Monogr.* **83**, 283–310 (2013).

650 63. Ávila-Thieme, M. I., Corcoran, D., Valdovinos, F. S., Navarrete, S. A. & Marquet, P. A.

651 *NetworkExtinction: Extinction Simulation in Food Webs*. (R package version 0.1.3., 2018).

652 64. Schneider, F. D., Brose, U., Rall, B. C. & Guill, C. Animal diversity and ecosystem functioning in

653 dynamic food webs. *Nat. Commun.* **7**, 12718 (2016).

#### 654 **Acknowledgments:**

655 We thank Kayla R.S. Hale, Paul Glaum, and Valentin Coco for technical help on modelling and

656 MATLAB programming, as well as, Jonathan Morris, Joseph Hartert, and Feng-Hsun Chang for

657 insightful discussions (all members of Valdovinos lab). We thank Mercedes Pascual and Stefano

658 Allesina for valuable comments and for sharing with us their code of their eigenvector-based

659 algorithm. We also thank E.A. Wieters for relevant opinions about empirical data. MA was

660 funded by CONICYT doctoral fellowship 21160860. PM acknowledges support from project

661 AFB-17008.

#### 662 **Author Contributions:**

663 M.I.A., S.A.N., P.A.M., and F.S.V. conceived the study. M.I.A. and F.S.V. formulated the

664 dynamic model, designed and implemented simulations, analyzed results, and wrote the first

665 draft of the manuscript. S.A.N. E.A.W and A.P. created the trophic interaction database and led

666 food web compilation. M.I.A. and D.C. created the code to perform the static extinction analysis.

667 All authors contributed to the final version of the paper.

#### 668 **Additional Information:**

669 Competing financial interests: The authors declare no competing financial interests.

670
